# Supplementary material for: Bulk and Single-Cell Profiling of Breast Tumors Identifies TREM-1 as a Dominant Immune Suppressive Marker Associated With Poor Outcomes
Source: PubMed Central journal article supplement (PMC8692779; doi:10.3389/fonc.2021.734959), 2021-12-08
Supplement: DataSheet_1.pdf [file DataSheet_1.pdf]

## Supplementary Material

Supplementary Figures 1 – 7

Supplementary Table 1

Supplementary Figure 1

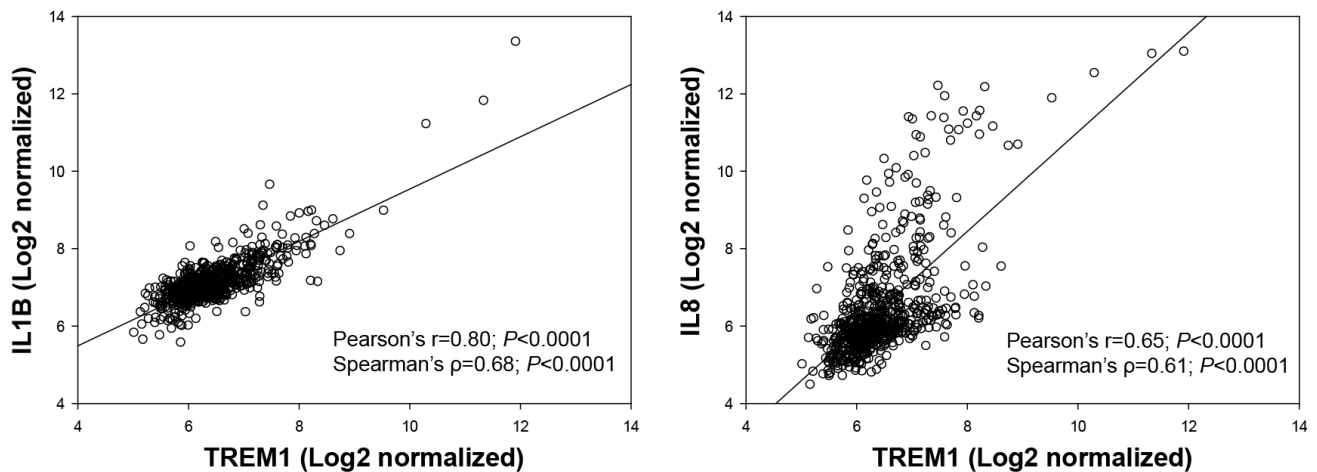

**Supplemental Figure 1. *TREM1* expression correlates significantly with expression of *IL1B* (left panel) and *IL8/CXCL8* (right panel) in the MDACC-701 dataset. Pearson's and Spearman correlation coefficients and p-values are shown.**

Supplementary Figure 2

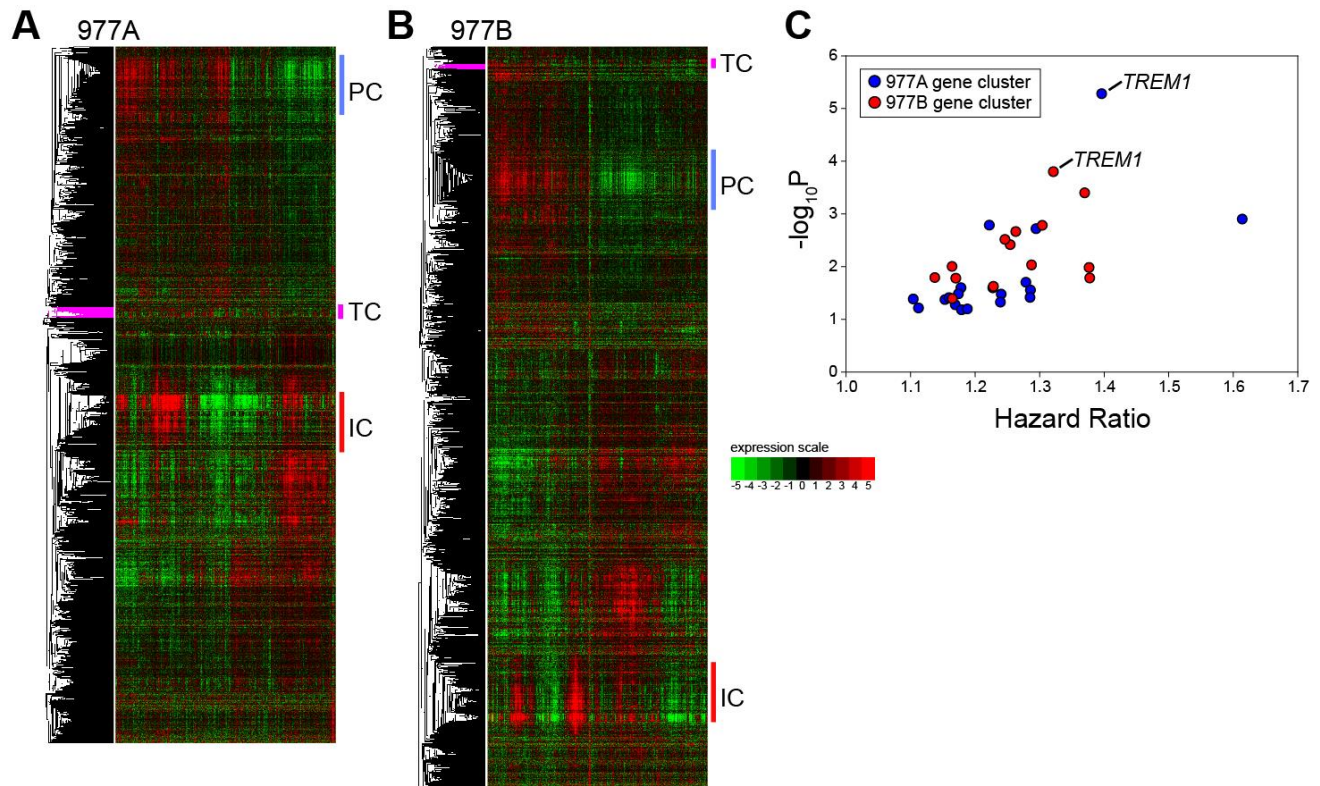

**Supplemental Figure 2. Discovery of a *TREM1*-associated gene cluster associated with poor DMFS.** Breast tumor expression profiles of the MC1 meta-cohort were randomized to two subgroups, comprising 977 tumors in each, for testing and validation purposes (977A and 977B, respectively). Within each subgroup, genes with significant associations with DMFS by Cox regression ( $q < 0.1$ , Benjamini-Hochberg) were selected for hierarchical clustering (977A,  $n = 3,094$  genes; 977B,  $n = 3,304$  genes). Genes corresponding to the proliferation gene cluster (PC, blue bar), immune gene clusters (IC, red bar) and the *TREM1*-associated gene cluster (TC, pink bar) are shown to the right of the heat maps for (A) 977A and (B) 977B. Tumors are represented by columns (dendrograms omitted); genes are represented by rows. Red indicates above-mean expression; green indicates below-mean expression. (C) Genes within the *TREM1*-associated gene clusters having average Pearson correlation of 0.28 in 977A (blue circles,  $n = 19$  genes) and 977B (red circles,  $n = 14$  genes) were compared by plotting Cox regression hazard ratios (X-axis) and false discovery rate-adjusted, negative  $\log_{10}$  p-values (Y-axis).

Supplementary Figure 3

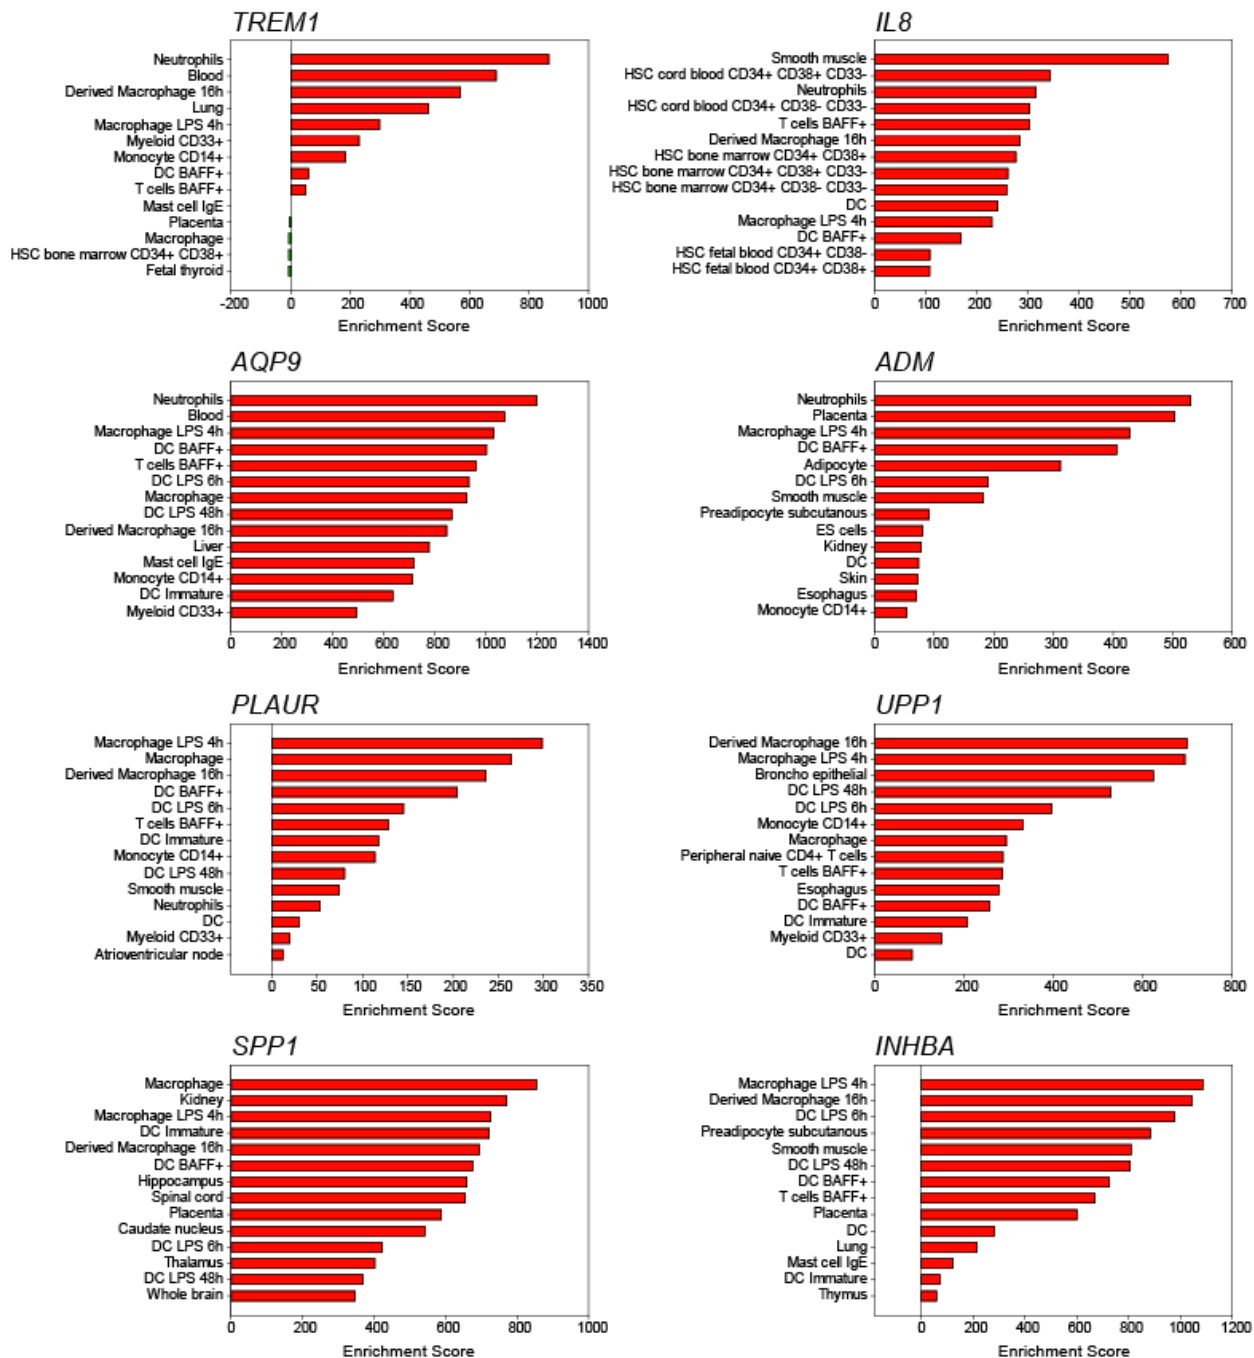

**Supplemental Figure 3. *TREM1* and co-expressed genes in breast tumors exhibit enriched expression in cells of the myeloid lineage.** Tissue-specific enrichment scores were generated according to methods described by Benita et. al. (Benita et al., 2010) for >14,000 genes comprising the Affymetrix U133A GeneChip and 126 human cell subsets and tissues. For each gene, the top 14 most enriched cell subsets and tissues are shown.

Supplementary Figure 4

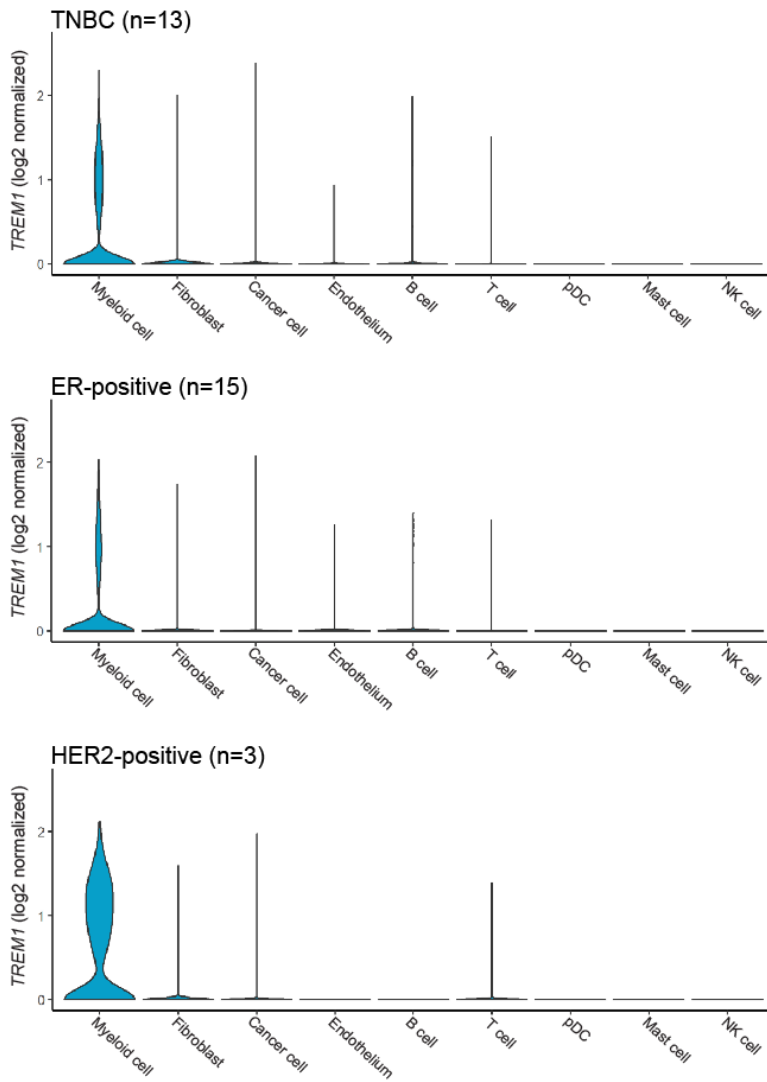

Supplemental Figure 4. *TREM1* expression in cellular subsets of the Bassez et. al. scRNAseq dataset grouped by breast cancer subtype.

# Supplementary Figure 5

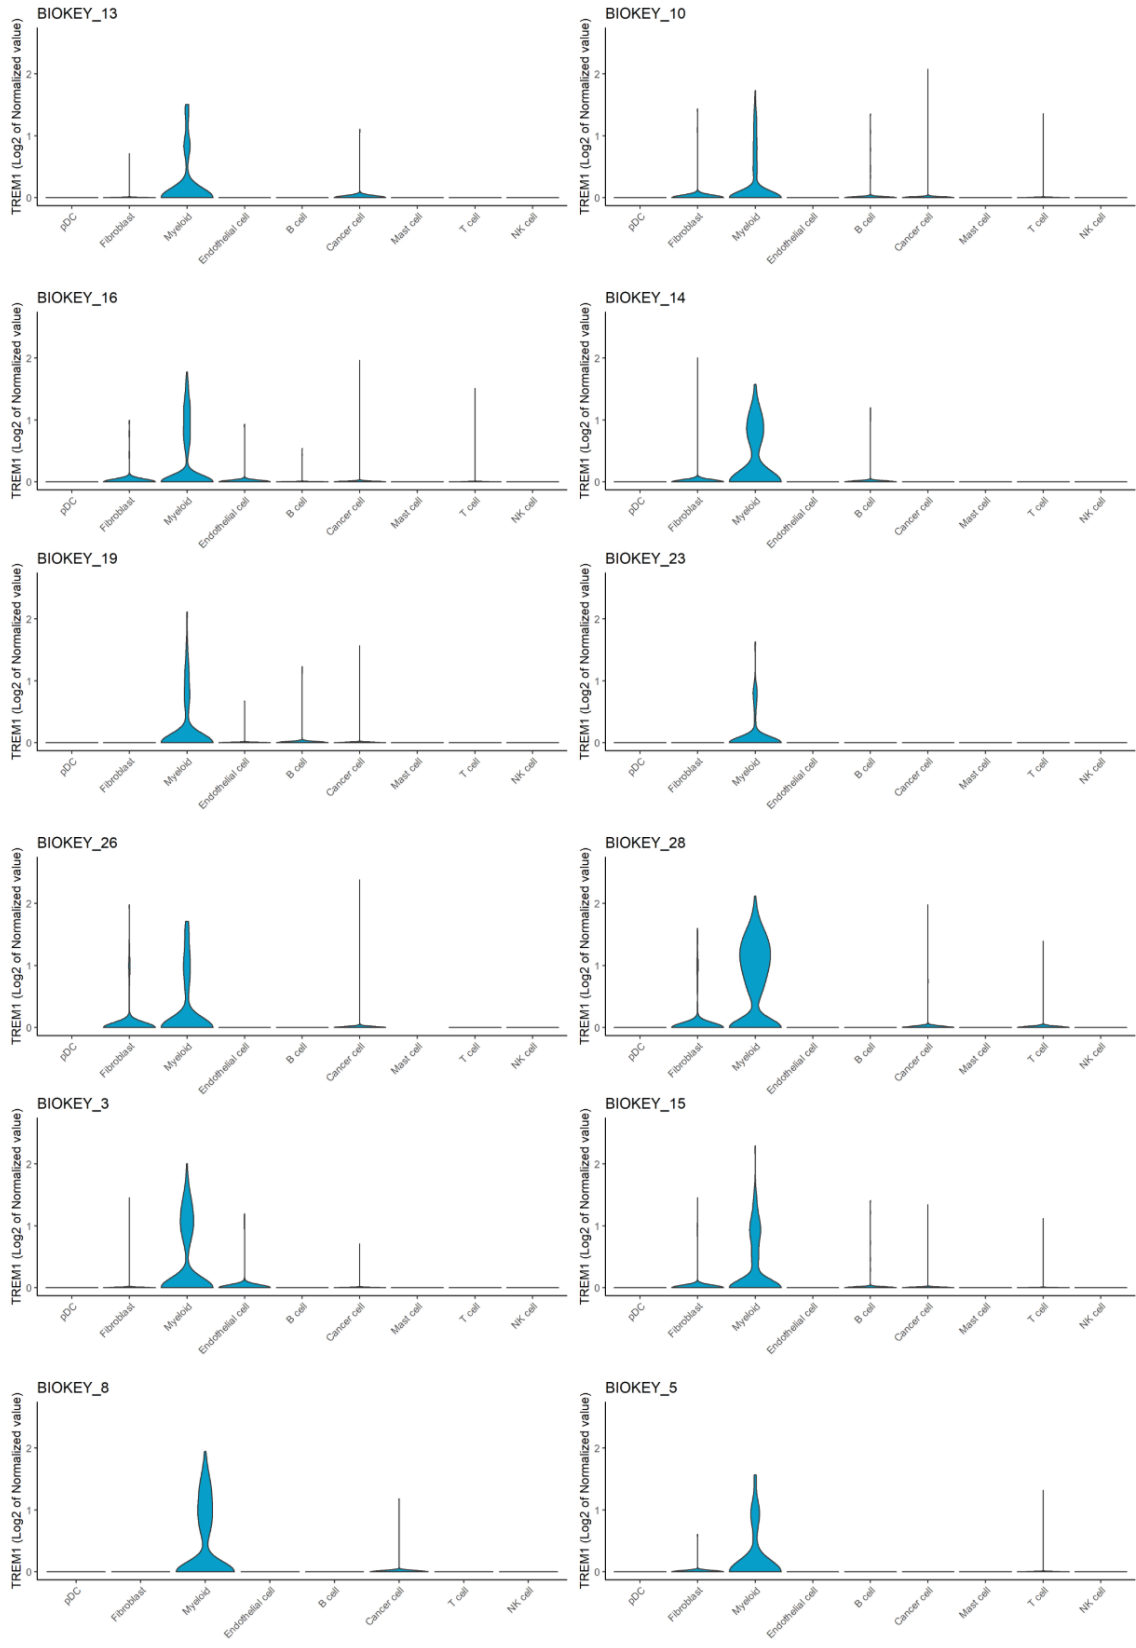

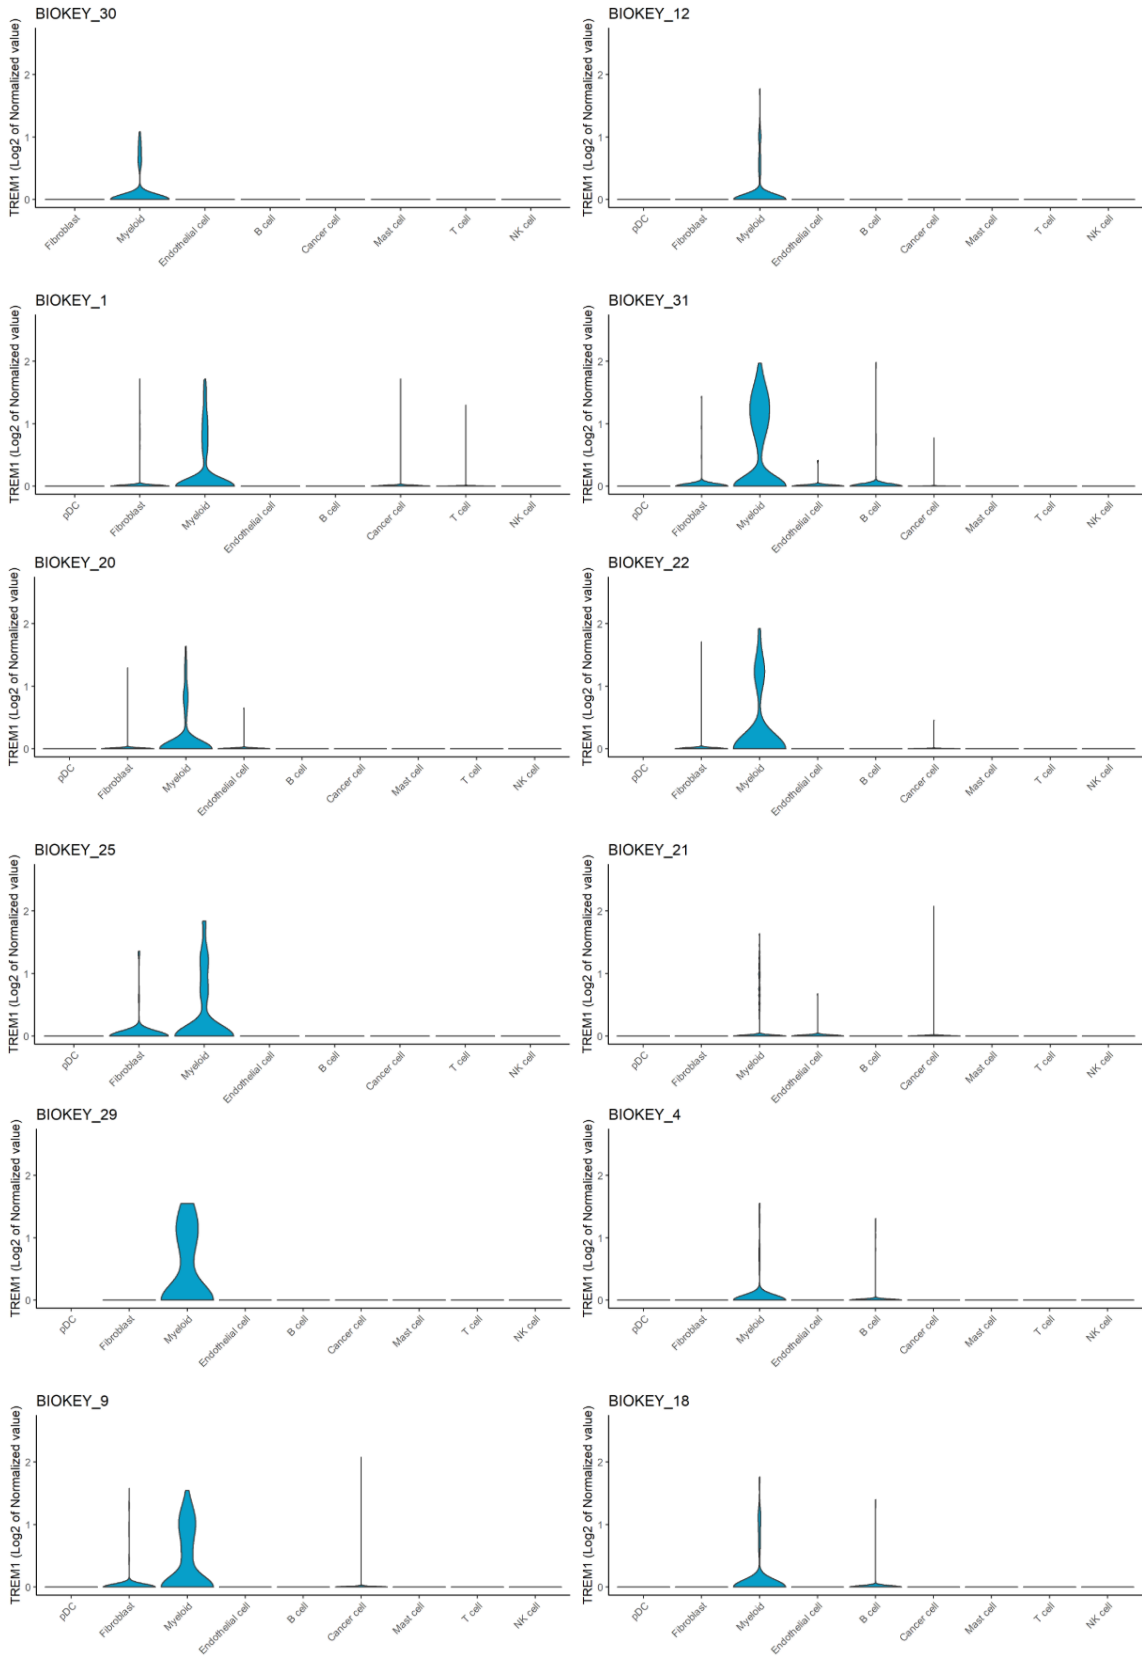

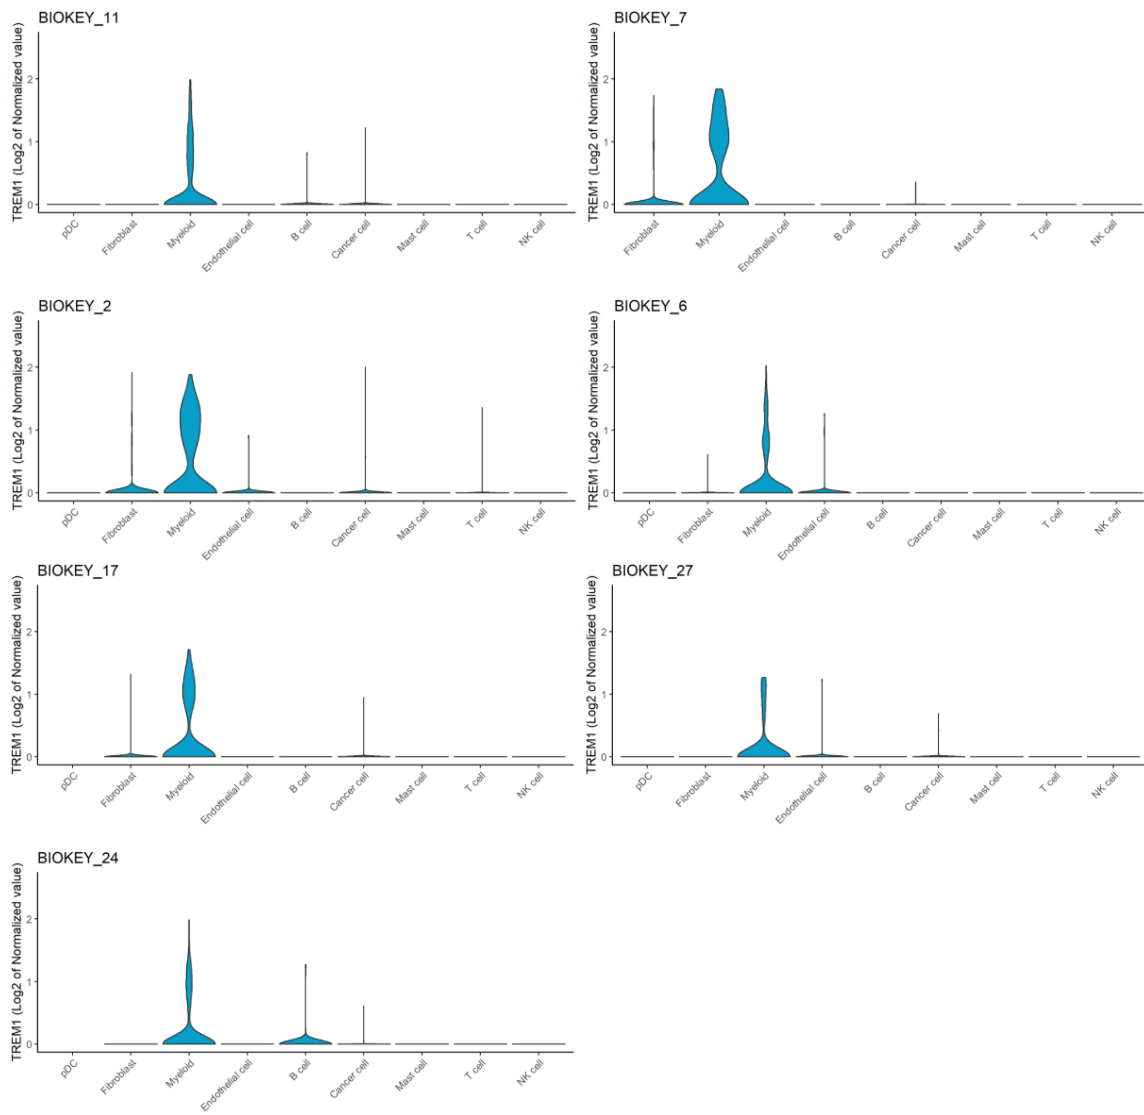

**Supplemental Figure 5. *TREM1* expression in cellular subsets of the Bassez et. al. dataset grouped by individual breast cancer patients (n=31).**





Supplementary Figure 7

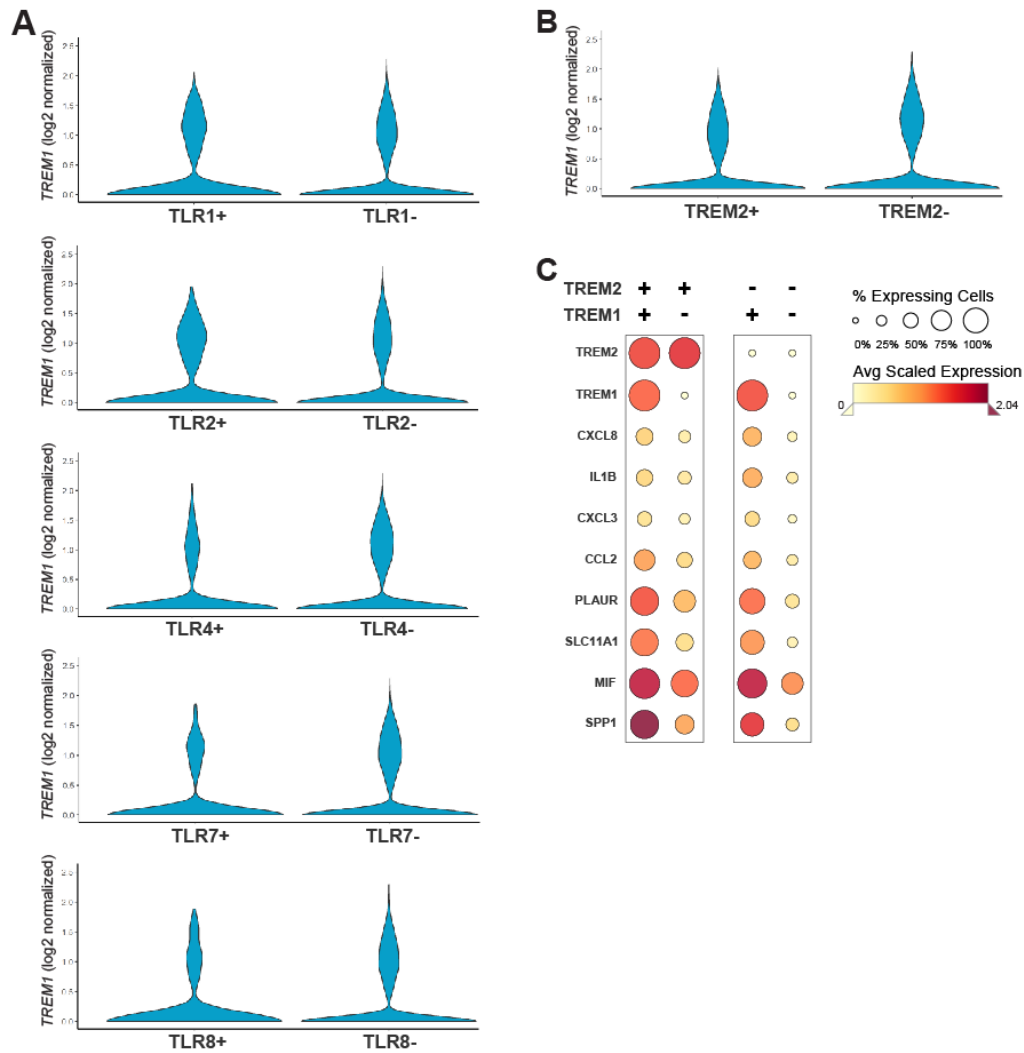

**Supplemental Figure 7. Analysis of *TREM1* myeloid expression and expression of myeloid receptors related to TREM-1 activation and function.** In the myeloid compartment of the Bassez et. al. dataset, (A) *TREM1* expression distributions are shown compared between *TLR*+ and *TLR*- myeloid cell populations, and (B) *TREM2*+ and *TREM2*- myeloid cells. (C) *TREM1* target gene frequencies of expression (% expressing cells) and average expression levels (heatmap) are shown compared between *TREM2*+ and *TREM2*- myeloid cells.

**Supplemental Table 1.** Genes and corresponding Z values identified by logistic regression as having statistical negative interactions with immune-associated neoadjuvant chemo response in the MDACC-701 dataset.

| Probest ID  | Gene Symbol  | Binary Z | Neutrophil Chemotaxis | Probest ID  | Gene Symbol | Binary Z | Neutrophil Chemotaxis |
|-------------|--------------|----------|-----------------------|-------------|-------------|----------|-----------------------|
| 202155_s_at | NUP214       | -4.1     |                       | 212777_at   | SOS1        | -2.3     |                       |
| 217336_at   | RPS10        | -3.9     |                       | 207540_s_at | SYK         | -2.3     | X                     |
| 218955_at   | BRF2         | -3.4     |                       | 78495_at    | ZNF783      | -2.3     |                       |
| 44822_s_at  | MIER2        | -3.3     |                       | 219623_at   | ACTR5       | -2.2     |                       |
| 37254_at    | ZNF133       | -3.3     |                       | 219437_s_at | ANKRD11     | -2.2     |                       |
| 219434_at   | TREM1        | -3.3     | X                     | 219521_at   | B3GAT1      | -2.2     |                       |
| 207205_at   | CEACAM4      | -3.1     |                       | 210708_x_at | CASP10      | -2.2     |                       |
| 209495_at   | CEP250       | -3.1     |                       | 206728_at   | ECE2        | -2.2     |                       |
| 202573_at   | CSNK1G2      | -3.1     |                       | 205321_at   | EIF2S3      | -2.2     |                       |
| 204594_s_at | MIEF1        | -3.1     |                       | 204817_at   | ESPL1       | -2.2     |                       |
| 204828_at   | RAD9A        | -3.1     |                       | 205650_s_at | FGA         | -2.2     |                       |
| 206019_at   | RBM19        | -3.1     |                       | 220819_at   | FRMD1       | -2.2     |                       |
| 216036_x_at | WDC1         | -3.1     |                       | 204973_at   | GJB1        | -2.2     |                       |
| 209797_at   | CNPY2        | -3.0     |                       | 211977_at   | GPR107      | -2.2     |                       |
| 32032_at    | ESS2         | -3.0     |                       | 221287_at   | GPRC5D      | -2.2     |                       |
| 221983_at   | RETREG2      | -3.0     |                       | 209558_s_at | HIP1R       | -2.2     |                       |
| 216505_x_at | RPS10P5      | -3.0     |                       | 219281_at   | MSRA        | -2.2     |                       |
| 201320_at   | SMARCC2      | -3.0     |                       | 217619_x_at | [unknown]   | -2.2     |                       |
| 214783_s_at | ANXA11       | -2.9     |                       | 216551_x_at | PLCG1       | -2.2     |                       |
| 205654_at   | C4BPA        | -2.9     |                       | 201896_s_at | PSRC1       | -2.2     |                       |
| 215568_x_at | [unknown]    | -2.9     |                       | 205228_at   | RBMS2       | -2.2     |                       |
| 203185_at   | RASSF2       | -2.9     |                       | 211735_x_at | SFTPC       | -2.2     |                       |
| 218141_at   | UBE2O        | -2.9     |                       | 205592_at   | SLC4A1      | -2.2     |                       |
| 220730_at   | ZNF778       | -2.9     |                       | 216271_x_at | SYDE1       | -2.2     |                       |
| 218274_s_at | ANKZF1       | -2.8     |                       | 213107_at   | TNIK        | -2.2     |                       |
| 218457_s_at | DNMT3A       | -2.8     |                       | 218020_s_at | ZFAND3      | -2.2     |                       |
| 214185_at   | KHDRBS1      | -2.8     |                       | 205437_at   | ZNF211      | -2.2     |                       |
| 212844_at   | RRP1B        | -2.8     |                       | 78330_at    | ZNF335      | -2.2     |                       |
| 41657_at    | STK11        | -2.8     |                       | 220501_at   | ACTL7A      | -2.1     |                       |
| 217733_s_at | TMSB10       | -2.8     |                       | 90265_at    | ADAP1       | -2.1     |                       |
| 216409_at   | ACSL6        | -2.7     |                       | 206105_at   | AFB2        | -2.1     |                       |
| 218950_at   | ARAP3        | -2.7     |                       | 202206_at   | ARL4C       | -2.1     |                       |
| 219261_at   | C7orf26      | -2.7     |                       | 212645_x_at | BRE         | -2.1     |                       |
| 221357_at   | CHRM4        | -2.7     |                       | 221764_at   | C19orf22    | -2.1     |                       |
| 202500_at   | DNAJB2       | -2.7     |                       | 206327_s_at | CDH15       | -2.1     |                       |
| 210736_x_at | DTNA         | -2.7     |                       | 219640_at   | CLDN15      | -2.1     |                       |
| 222113_s_at | EPS15L1      | -2.7     |                       | 206970_at   | CNTN2       | -2.1     |                       |
| 206885_x_at | GH1          | -2.7     |                       | 208159_x_at | DDX11       | -2.1     |                       |
| 210079_x_at | KCNAB1       | -2.7     |                       | 208250_s_at | DMBT1       | -2.1     |                       |
| 221792_at   | RAB6A        | -2.7     |                       | 221812_at   | FBXO42      | -2.1     |                       |
| 37462_i_at  | SF3A2        | -2.7     |                       | 208885_at   | LCP1        | -2.1     |                       |
| 221939_at   | CARM1        | -2.6     |                       | 205036_at   | LSM6        | -2.1     |                       |
| 207556_s_at | DGKZ         | -2.6     |                       | 43544_at    | MED16       | -2.1     |                       |
| 218660_at   | DYSF         | -2.6     |                       | 211599_x_at | MET         | -2.1     |                       |
| 213242_x_at | KIAA0284     | -2.6     |                       | 215292_s_at | MKL1        | -2.1     |                       |
| 213281_at   | LOC100288387 | -2.6     |                       | 216554_s_at | [unknown]   | -2.1     |                       |
| 35147_at    | MCF2L        | -2.6     |                       | 217390_x_at | [unknown]   | -2.1     |                       |
| 215484_at   | [unknown]    | -2.6     |                       | 208360_s_at | [unknown]   | -2.1     |                       |
| 205656_at   | PCDH17       | -2.6     |                       | 209062_x_at | NCOA3       | -2.1     |                       |
| 219459_at   | POLR3B       | -2.6     |                       | 206402_s_at | NPFF        | -2.1     |                       |
| 200869_at   | RPL18A       | -2.6     |                       | 205261_at   | PGC         | -2.1     |                       |
| 207355_at   | SLC1A7       | -2.6     |                       | 204613_at   | PLCG2       | -2.1     |                       |
| 214886_at   | ZNF266       | -2.6     |                       | 208286_x_at | POUSF1      | -2.1     |                       |
| 210662_s_at | ZNF589       | -2.6     |                       | 204044_at   | QPRT        | -2.1     |                       |
| 214322_at   | CAMK2G       | -2.5     |                       | 216383_at   | RPL18A      | -2.1     |                       |
| 220015_at   | CASZ1        | -2.5     |                       | 214370_at   | S100A8      | -2.1     | X                     |
| 214627_at   | EPX          | -2.5     |                       | 203535_at   | S100A9      | -2.1     | X                     |
| 210981_s_at | GRK6         | -2.5     |                       | 209381_x_at | SF3A2       | -2.1     |                       |
| 216309_x_at | JRK          | -2.5     |                       | 215926_x_at | SNAPC4      | -2.1     |                       |
| 210058_at   | MAPK13       | -2.5     |                       | 52169_at    | STRADA      | -2.1     |                       |
| 202463_s_at | MBD3         | -2.5     |                       | 203046_s_at | TIMELESS    | -2.1     |                       |
| 221379_at   | [unknown]    | -2.5     |                       | 215540_at   | TRAC        | -2.1     |                       |
| 219039_at   | SEMA4C       | -2.5     |                       | 211432_s_at | TYRO3       | -2.1     |                       |
| 218596_at   | TBC1D13      | -2.5     |                       | 65521_at    | UBE2D4      | -2.1     |                       |
| 201768_s_at | CLINT1       | -2.4     |                       | 211682_x_at | UGT2B28     | -2.1     |                       |
| 220522_at   | CRB1         | -2.4     |                       | 212156_at   | VPS39       | -2.1     |                       |
| 214030_at   | CRYBG3       | -2.4     |                       | 203892_at   | WFDC2       | -2.1     |                       |
| 219914_at   | ECEL1        | -2.4     |                       | 207708_at   | ALOXE3      | -2.0     |                       |
| 221539_at   | EIF4EBP1     | -2.4     |                       | 219141_s_at | AMBRA1      | -2.0     |                       |
| 210043_at   | FRMD8        | -2.4     |                       | 221077_at   | ARMC4       | -2.0     |                       |
| 214626_s_at | GANAB        | -2.4     |                       | 220659_s_at | C7orf43     | -2.0     |                       |
| 220165_at   | INO80D       | -2.4     |                       | 207861_at   | CCL22       | -2.0     | X                     |
| 49329_at    | KLHL22       | -2.4     |                       | 213523_at   | CCNE1       | -2.0     |                       |
| 207908_at   | KRT2         | -2.4     |                       | 216293_at   | CLTA        | -2.0     |                       |
| 210252_s_at | MADD         | -2.4     |                       | 214076_at   | GFOD2       | -2.0     |                       |
| 207473_at   | MLN          | -2.4     |                       | 213180_s_at | GOSR2       | -2.0     |                       |
| 215200_x_at | [unknown]    | -2.4     |                       | 204949_at   | ICAM3       | -2.0     |                       |
| 202924_s_at | PLAGL2       | -2.4     |                       | 213450_s_at | ICOSLG      | -2.0     |                       |
| 220894_x_at | PRDM12       | -2.4     |                       | 205067_at   | IL1B        | -2.0     | X                     |
| 220758_s_at | ROBO4        | -2.4     |                       | 202859_x_at | IL8         | -2.0     | X                     |
| 209980_s_at | SHMT1        | -2.4     |                       | 211806_s_at | KCNJ15      | -2.0     |                       |
| 214096_s_at | SHMT2        | -2.4     |                       | 207339_s_at | LTB         | -2.0     |                       |
| 209777_s_at | SLC19A1      | -2.4     |                       | 206571_s_at | MAP4K4      | -2.0     |                       |
| 211123_at   | SLC5A5       | -2.4     |                       | 210059_s_at | MAPK13      | -2.0     |                       |
| 216042_at   | TNFRSF25     | -2.4     |                       | 202519_at   | MLXIP       | -2.0     |                       |
| 213822_s_at | UBE3B        | -2.4     |                       | 203036_s_at | MTSS1       | -2.0     |                       |
| 37860_at    | ZNF337       | -2.4     |                       | 210888_x_at | MYL4        | -2.0     |                       |
| 214760_at   | ZNF337       | -2.4     |                       | 213955_at   | MYOZ3       | -2.0     |                       |
| 216750_at   | APBB2        | -2.3     |                       | 216172_at   | [unknown]   | -2.0     |                       |
| 214052_x_at | BAT2L2       | -2.3     |                       | 221382_at   | [unknown]   | -2.0     |                       |
| 214643_x_at | BIN1         | -2.3     |                       | 222368_at   | [unknown]   | -2.0     |                       |
| 219442_at   | C16orf67     | -2.3     |                       | 215279_at   | [unknown]   | -2.0     |                       |
| 219161_s_at | CKLF         | -2.3     |                       | 217088_s_at | NCR1        | -2.0     |                       |
| 204971_at   | CSTA         | -2.3     |                       | 221526_x_at | PARD3       | -2.0     |                       |
| 2028_s_at   | E2F1         | -2.3     |                       | 215031_x_at | RNF126      | -2.0     |                       |
| 206429_at   | F2RL1        | -2.3     |                       | 201909_at   | RPS4Y1      | -2.0     |                       |
| 60528_at    | JMJD7        | -2.3     |                       | 202917_s_at | S100A8      | -2.0     | X                     |
| 210635_s_at | KLHL20       | -2.3     |                       | 221701_s_at | STRA6       | -2.0     |                       |
| 37796_at    | LRCH4        | -2.3     |                       | 216919_at   | TP53I11     | -2.0     |                       |
| 219320_at   | MYO19        | -2.3     |                       | 221906_at   | TXNRD3      | -2.0     |                       |
| 204448_s_at | PDCL         | -2.3     |                       | 204598_at   | UBOX5       | -2.0     |                       |
| 216458_at   | PQLC3        | -2.3     |                       | 210301_at   | XDH         | -2.0     |                       |
| 219897_at   | RNF122       | -2.3     |                       | 214713_at   | YLPM1       | -2.0     |                       |
|             |              |          |                       | 214795_at   | ZMYND8      | -2.0     |                       |
